# Supplementary material
Source: publisher site journal article supplement (https://www.dovepress.com/article/585206)
Supplement: Supplementary file 1 [file 585206%20Revised%20Supplementary%20tables.docx]

**Supplementary table 1.** Knowledge, attitude and practice dimensions.

| **Knowledge** | | | **N(%)** | | |
| --- | --- | --- | --- | --- | --- |
| **very well** | **somewhat** | **understood** |
| 1. Inattention while walking, uneven surfaces, excessive body weight, prolonged sitting causing lower limb weakness, insufficient warm-up before exercise, and excessive exercise can all potentially cause ankle sprains. | | | 320(57.14) | 199(35.54) | 41(7.32) |
| 1. The treatment recommendation for acute ankle sprains is to follow the R.I.C.E principle (Rest, Ice, Compression, Elevation. | | | 298(53.21) | 189(33.75) | 73(13.04) |
| 1. Ankle sprains can lead to chronic ankle instability, with the progression related to factors such as the extent of the injury, acute treatment, body weight, and lifestyle or exercise habits. | | | 250(44.64) | 238(42.5) | 72(12.86) |
| 1. Chronic functional ankle instability refers to a chronic sports-related injury characterized by repeated sprains, a feeling of instability (such as weakness while walking, decreased ankle strength, and impaired posture control), pain, swelling, and other symptoms following the initial sprain. | | | 208(37.14) | 241(43.04) | 111(19.82) |
| 1. Chronic ankle instability may lead to complications such as talar osteochondral injury and osteoarthritis, resulting in long-term ankle pain, functional impairment in daily activities and exercise, and increased risk of falls. | | | 183(32.68) | 234(41.79) | 143(25.54) |
| 1. Conservative treatment methods for ankle instability include weight reduction, injury avoidance, ankle braces, elastic bandages, and rehabilitation therapy. | | | 217(38.75) | 277(49.46) | 66(11.79) |
| 1. Do you know how to use ankle braces to prevent chronic ankle instability? | | | 176(31.43) | 218(38.93) | 166(29.64) |
| 1. Severe ankle sprains or chronic ankle instability can be treated with surgical intervention. | | | 188(33.57) | 252(45) | 120(21.43) |
| **Attitude** | **Strongly agree** | **Agree** | **Neutral** | **Disagree** | **Strongly disagree** |
| 1. Ankle sprains and chronic ankle instability severely affect my quality of life. N； | 159(28.39) | 187(33.39) | 151(26.96) | 38(6.79) | 25(4.46) |
| 1. I feel that I am easily affected by ankle sprains and chronic ankle instability. N； | 101(18.04) | 153(27.32) | 167(29.82) | 94(16.79) | 45(8.04) |
| 1. I am concerned about the complications and adverse effects that may arise from ankle sprains and chronic ankle instability.N | 142(25.36) | 215(38.39) | 138(24.64) | 38(6.79) | 27(4.82) |
| 1. I believe that taking preventive measures is important to avoid ankle sprains and chronic ankle instability. P | 234(41.79) | 230(41.07) | 80(14.29) | 8(1.43) | 8(1.43) |
| 1. I believe that taking correct preventive measures can reduce the incidence of ankle sprains. P | 272(48.57) | 232(41.43) | 47(8.39) | 4(0.71) | 5(0.89) |
| 1. I am willing to actively learn how to prevent ankle sprains and chronic ankle instability. P | 276(49.29) | 220(39.29) | 55(9.82) | 4(0.71) | 5(0.89) |
| 1. I am willing to take actions to reduce the risk of ankle sprains and chronic ankle instability. P | 275(49.11) | 218(38.93) | 56(10) | 6(1.07) | 5(0.89) |
| 1. If the ankle sprain is severe or the symptoms of chronic instability are significant, and conservative treatment is ineffective, I am willing to undergo surgical treatment. | 153(27.32) | 192(34.29) | 167(29.82) | 37(6.61) | 11(1.96) |
| **Practice** | **Always** | **Often** | **Sometimes** | **Rarely** | **Never** |
| 1. Do you regularly engage in ankle strength training (e.g., balance exercises, ankle movements) to strengthen the muscles around the ankle? P | 57(10.18) | 83(14.82) | 186(33.21) | 153(27.32) | 81(14.46) |
| 1. Do you use assistive devices (e.g., ankle bandages, braces) to help with daily activities and reduce the burden on your ankle? P | 48(8.57) | 71(12.68) | 136(24.29) | 161(28.75) | 144(25.71) |
| 1. Do you actively seek help from healthcare professionals, such as physical therapists or rehabilitation doctors, to learn about ankle rehabilitation exercises? P | 52(9.29) | 93(16.61) | 181(32.32) | 146(26.07) | 88(15.71) |
| 1. Do you follow the recommendations of your doctor or physical therapist for resting and icing the injured ankle? P | 105(18.75) | 151(26.96) | 187(33.39) | 78(13.93) | 39(6.96) |
| 1. Do you follow the rehabilitation recommendations of your doctor or physical therapist for ankle rehabilitation exercises? P | 87(15.54) | 104(18.57) | 188(33.57) | 116(20.71) | 65(11.61) |
| 1. Do you avoid participating in activities that pose a potential risk to your ankle (e.g., high-intensity sports)? P | 122(21.79) | 138(24.64) | 152(27.14) | 108(19.29) | 40(7.14) |
| 1. Do you consistently protect your ankle, such as by wearing appropriate footwear during sports or activities? P | 135(24.11) | 206(36.79) | 143(25.54) | 55(9.82) | 21(3.75) |
| 1. Do you regularly undergo ankle examinations or assessments to monitor your rehabilitation progress? P | 59(10.54) | 65(11.61) | 136(24.29) | 165(29.46) | 135(24.11) |
| 1. Do you make an effort to control your weight to reduce the load on your ankle and the risk of re-injury? P | 57(10.18) | 83(14.82) | 186(33.21) | 153(27.32) | 81(14.46) |

Notes: P indicates positively worded items (scored as written); N indicates negatively worded items (reverse-scored).

**Supplementary table 2.** Model fit.

| Indicators | Reference | Results |
| --- | --- | --- |
| RMSEA | <0.08 Good | 0.030 |
| SRMR | <0.08 Good | 0.017 |
| TLI | >0.8 Good | 0.957 |
| CFI | >0.8 Good | 0.987 |
